# Supplementary material
Source: MDPI journal article supplement (https://www.mdpi.com/2073-4433/14/5/867)
Supplement: s1 [file s1]

## Supplementary Material

# Air Pollutants and Their Impact on Chronic Diseases— A Retrospective Study in Bucharest, Romania

Beatrice Mahler <sup>1,2</sup>, Dragoș Băiceanu <sup>1,\*</sup>, Traian Constantin Panciu <sup>1</sup>, Radu Marian Florea <sup>2</sup>, Ana Luiza Iorga <sup>1,2</sup>,  
Marcin Gnat <sup>3</sup>, Cornelia Florina German <sup>4</sup>, Simona Pârvu <sup>2,5</sup>, Dorel Paraschiv <sup>6</sup>, Daniela Manea <sup>7</sup>, Mihaela Mihai <sup>7,\*</sup>,  
Elmira Ibraim <sup>1</sup>, Bogdan Timar <sup>8</sup> and Florin Dumitru Mihălțan <sup>1,2</sup>

<sup>1</sup> Marius Nasta Institute of Pneumology, 050159 Bucharest, Romania; beatricemahler@gmail.com (B.M.); panciu.traian@gmail.com (T.C.P.); analuiza\_iorga@yahoo.com (A.L.I.); ielmira2000@yahoo.com (E.I.); mihaltan@starmets.ro (F.D.M.)

<sup>2</sup> Faculty of Medicine, Carol Davila University of Medicine and Pharmacy, 050474 Bucharest, Romania; radu.florea@stud.umfcd.ro (R.M.F.); simona.parvu@umfcd.ro (S.P.)

<sup>3</sup> Airly Sp. z o.o., 31-545 Kraków, Poland; m.gnat@airly.org

<sup>4</sup> The Federation for a Clean Environment, 77962 Chiajna, Romania; cornellia.german@gmail.com

<sup>5</sup> The National Institute for Public Health, 050463 Bucharest, Romania

<sup>6</sup> Faculty of International Business and Economics, The Bucharest University of Economic Studies, 010374 Bucharest, Romania; dorel.paraschiv@ase.ro

<sup>7</sup> Faculty of Economic Cybernetics, Statistics and Informatics, The Bucharest University of Economic Studies, 010552 Bucharest, Romania; daniela.manea@csie.ase.ro

<sup>8</sup> Faculty of Medicine, Victor Babes University of Medicine and Pharmacy, 300041 Timisoara, Romania; bogdan.timar@umft.ro

\* Correspondence: dragos\_baiceanu@yahoo.com (D.B.); mihaela.mihai@csie.ase.ro (M.M.)

**Citation:** Mahler, B.; Băiceanu, D.; Panciu, T.C.; Florea, R.M.; Iorga, A.L.; Gnat, M.; German, C.F.; Pârvu, S.; Paraschiv, D.; Manea, D.; et al. Air Pollutants and Their Impact on Chronic Diseases—A Retrospective Study in Bucharest, Romania. *Atmosphere* **2023**, *14*, 867. <https://doi.org/10.3390/atmos14050867>

Academic Editors: Changqing Lin, Christos Argyropoulos and Zoi Dorothea Pana

Received: 3 April 2023

Revised: 2 May 2023

Accepted: 6 May 2023

Published: 12 May 2023

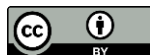

**Copyright:** © 2023 by the authors. Licensee MDPI, Basel, Switzerland. This article is an open access article distributed under the terms and conditions of the Creative Commons Attribution (CC BY) license (<https://creativecommons.org/licenses/by/4.0/>).

## Section S1. Evolution of the Number of Sensors and DLV Exceedances in Bucharest during the Period 20.08.2018–01.06.2022

In 2018, for the period included in the analysis (the last 4 months of the year), 10 of the 11 active sensors with more than 50 records recorded exceedances of the DLV in a greater number of days than the maximum allowed (35 times/year) (Table S1).

**Table S1.** Daily records and number of exceedances of the DLV in Bucharest for 2018 (20.08.2018–31.12.2018).

| Sensor ID | Total days of records | Number of days with exceedances | Percentage of days with exceedances in total records |
|-----------|-----------------------|---------------------------------|------------------------------------------------------|
| 5619      | 134                   | 51                              | 38%                                                  |
| 5628      | 134                   | 43                              | 32%                                                  |
| 5629      | 133                   | 48                              | 36%                                                  |
| 5652      | 131                   | 51                              | 39%                                                  |
| 5718      | 119                   | 43                              | 36%                                                  |
| 6088      | 106                   | 53                              | 50%                                                  |
| 5671      | 104                   | 29                              | 28%                                                  |
| 6139      | 97                    | 53                              | 55%                                                  |
| 9840      | 96                    | 56                              | 58%                                                  |
| 6156      | 95                    | 50                              | 53%                                                  |
| 6509      | 64                    | 45                              | 70%                                                  |

In 2019, air quality monitoring in Bucharest was carried out, mainly by 17 sensors (with over 50 measurements/year), and the values for PM10 particles indicated exceedances more than 35 times/year in 10 of them (Table S2).

**Table S2.** Daily records and number of exceedances of the daily limit value in Bucharest for the year 2019.

| Sensor ID | Total days of records | Number of days with exceedances | Percentage of days with exceedances in total records |
|-----------|-----------------------|---------------------------------|------------------------------------------------------|
| 5619      | 365                   | 71                              | 19%                                                  |
| 5628      | 365                   | 48                              | 13%                                                  |
| 5629      | 365                   | 72                              | 20%                                                  |
| 5652      | 365                   | 65                              | 18%                                                  |
| 6088      | 365                   | 74                              | 20%                                                  |
| 6156      | 365                   | 75                              | 21%                                                  |
| 6509      | 365                   | 64                              | 18%                                                  |
| 6139      | 342                   | 44                              | 13%                                                  |
| 7620      | 331                   | 28                              | 8%                                                   |
| 9840      | 314                   | 77                              | 25%                                                  |
| 7663      | 303                   | 0                               | 0%                                                   |
| 8019      | 282                   | 42                              | 15%                                                  |
| 5718      | 223                   | 33                              | 15%                                                  |
| 8997      | 175                   | 27                              | 15%                                                  |
| 9836      | 127                   | 30                              | 24%                                                  |
| 10046     | 78                    | 30                              | 38%                                                  |
| 87199     | 54                    | 12                              | 22%                                                  |

Regarding the year 2020, from forty-eight sensors (with more than 50 measurements/year), about 40% of them having more than three hundred records, we identified thirty-five exceedances of the DLV only in six of them. (Table S3)

**Table S3.** Daily records and number of exceedances of the daily limit value in Bucharest for the year 2020.

| Sensor ID | Total days of records | Number of days with exceedances | Percentage of days with exceedances in total records | Sensor ID | Total days of records | Number of days exceeded | Percentage of days with exceedances in total records |
|-----------|-----------------------|---------------------------------|------------------------------------------------------|-----------|-----------------------|-------------------------|------------------------------------------------------|
| 5629      | 366                   | 43                              | 12%                                                  | 13214     | 261                   | 25                      | 10%                                                  |
| 5652      | 366                   | 36                              | 10%                                                  | 13215     | 261                   | 10                      | 4%                                                   |
| 6088      | 366                   | 34                              | 9%                                                   | 13206     | 259                   | 19                      | 7%                                                   |
| 6156      | 366                   | 37                              | 10%                                                  | 13253     | 240                   | 6                       | 3%                                                   |
| 7620      | 366                   | 15                              | 4%                                                   | 13254     | 238                   | 15                      | 6%                                                   |
| 8019      | 366                   | 55                              | 15%                                                  | 15659     | 198                   | 20                      | 10%                                                  |
| 9836      | 366                   | 34                              | 9%                                                   | 37982     | 196                   | 12                      | 6%                                                   |
| 9840      | 366                   | 33                              | 9%                                                   | 11888     | 188                   | 7                       | 4%                                                   |
| 10046     | 366                   | 31                              | 8%                                                   | 18391     | 185                   | 9                       | 5%                                                   |
| 87199     | 366                   | 23                              | 6%                                                   | 18392     | 185                   | 14                      | 8%                                                   |
| 6509      | 365                   | 24                              | 7%                                                   | 87043     | 185                   | 4                       | 2%                                                   |
| 5619      | 359                   | 48                              | 13%                                                  | 11894     | 176                   | 2                       | 1%                                                   |
| 12082     | 342                   | 20                              | 6%                                                   | 7663      | 175                   | 0                       | 0%                                                   |
| 11981     | 341                   | 19                              | 6%                                                   | 8997      | 155                   | 27                      | 17%                                                  |
| 12083     | 340                   | 9                               | 3%                                                   | 12073     | 153                   | 2                       | 1%                                                   |
| 11947     | 338                   | 37                              | 11%                                                  | 6139      | 146                   | 26                      | 18%                                                  |
| 11727     | 334                   | 14                              | 4%                                                   | 18435     | 140                   | 0                       | 0%                                                   |
| 11734     | 334                   | 26                              | 8%                                                   | 23888     | 92                    | 7                       | 8%                                                   |
| 11725     | 333                   | 26                              | 8%                                                   | 30455     | 92                    | 18                      | 20%                                                  |
| 11980     | 323                   | 18                              | 6%                                                   | 29508     | 91                    | 0                       | 0%                                                   |
| 5628      | 319                   | 18                              | 6%                                                   | 32893     | 64                    | 10                      | 16%                                                  |
| 12098     | 298                   | 27                              | 9%                                                   | 32894     | 64                    | 13                      | 20%                                                  |
| 13118     | 289                   | 6                               | 2%                                                   | 32909     | 60                    | 9                       | 15%                                                  |
| 18797     | 269                   | 22                              | 8%                                                   | 32992     | 53                    | 18                      | 34%                                                  |

In 2021, 15 out of the 61 sensors (with more than 50 measurements/year), recorded more than 35 exceedances of the DLV (Table S4).

**Table S4.** Daily records and number of exceedances of the daily limit value in Bucharest for the year 2021.

| Sensor ID | Total days of records | Number of days with exceedances | Percentage of days with exceedances in total records | Sensor ID | Total days of records | Number of days with exceedances | Percentage of days with exceedances in total records |
|-----------|-----------------------|---------------------------------|------------------------------------------------------|-----------|-----------------------|---------------------------------|------------------------------------------------------|
| 5629      | 365                   | 29                              | 8%                                                   | 8019      | 355                   | 50                              | 14%                                                  |
| 5652      | 365                   | 32                              | 9%                                                   | 29508     | 339                   | 5                               | 1%                                                   |
| 6088      | 365                   | 40                              | 11%                                                  | 87043     | 325                   | 2                               | 1%                                                   |
| 6156      | 365                   | 31                              | 8%                                                   | 87199     | 323                   | 8                               | 2%                                                   |
| 6509      | 365                   | 22                              | 6%                                                   | 13214     | 315                   | 49                              | 16%                                                  |
| 9840      | 365                   | 29                              | 8%                                                   | 39805     | 310                   | 34                              | 11%                                                  |
| 10046     | 365                   | 22                              | 6%                                                   | 5628      | 289                   | 10                              | 3%                                                   |
| 11725     | 365                   | 30                              | 8%                                                   | 9836      | 289                   | 34                              | 12%                                                  |
| 11727     | 365                   | 9                               | 2%                                                   | 37982     | 281                   | 51                              | 18%                                                  |
| 11734     | 365                   | 24                              | 7%                                                   | 33039     | 272                   | 14                              | 5%                                                   |
| 11947     | 365                   | 50                              | 14%                                                  | 40224     | 248                   | 9                               | 4%                                                   |
| 11980     | 365                   | 44                              | 12%                                                  | 18797     | 242                   | 22                              | 9%                                                   |
| 11981     | 365                   | 40                              | 11%                                                  | 42631     | 241                   | 7                               | 3%                                                   |

|       |     |    |     |       |     |    |     |
|-------|-----|----|-----|-------|-----|----|-----|
| 12082 | 365 | 45 | 12% | 6139  | 239 | 13 | 5%  |
| 12083 | 365 | 18 | 5%  | 9836  | 289 | 34 | 12% |
| 12098 | 365 | 73 | 20% | 37982 | 281 | 51 | 18% |
| 13118 | 365 | 18 | 5%  | 33039 | 272 | 14 | 5%  |
| 13215 | 365 | 30 | 8%  | 40224 | 248 | 9  | 4%  |
| 13253 | 365 | 23 | 6%  | 18797 | 242 | 22 | 9%  |
| 13254 | 365 | 47 | 13% | 42631 | 241 | 7  | 3%  |
| 15659 | 365 | 41 | 11% | 6139  | 239 | 13 | 5%  |
| 18391 | 365 | 20 | 5%  | 41038 | 237 | 3  | 1%  |
| 18392 | 365 | 31 | 8%  | 32894 | 181 | 15 | 8%  |
| 32893 | 365 | 32 | 9%  | 40642 | 117 | 17 | 15% |
| 32909 | 365 | 26 | 7%  | 39928 | 116 | 0  | 0%  |
| 32992 | 365 | 59 | 16% | 40046 | 113 | 0  | 0%  |
| 36614 | 365 | 32 | 9%  | 40310 | 107 | 7  | 7%  |
| 36784 | 365 | 38 | 10% | 86526 | 107 | 4  | 4%  |
| 37504 | 365 | 5  | 1%  | 42790 | 90  | 0  | 0%  |
| 11726 | 364 | 19 | 5%  | 30455 | 81  | 21 | 26% |
| 11729 | 364 | 15 | 4%  | 7620  | 80  | 0  | 0%  |
| 13206 | 362 | 50 | 14% | 23888 | 76  | 3  | 4%  |
| 37505 | 361 | 7  | 2%  | 7663  | 74  | 0  | 0%  |
| 11732 | 360 | 21 | 6%  | 86785 | 52  | 11 | 21% |

In the case of 2022, since we did not have records for the entire year, the analysis could not be carried out by reporting to the daily limit value ( $50 \mu\text{g}/\text{m}^3$ ) that must not be exceeded more than 35 times/year. The available data for the first 5 months of 2022 showed that for the sixty-eight sensors (for which there were more than fifty records), the average number of days with exceedances was approximately three, but this value is not representative because there was an increased heterogeneity of the data. Half of the sensors included in the analysis showed a number of days exceeding the daily limit greater than two. There were also outliers for nine sensors which registered a share between 9 to 13% of the days with exceedances. (Table S5, Table S6, Figure S1)

**Table S5.** Daily records and number of exceedances of the daily limit value in Bucharest for the year 2022 (01.01.2022-01.06.2022) at sensors with more than 50 measurements.

| Sensor ID | Total days of records | Number of days with exceedances | Percentage of days with exceedances in total records | Sensor ID | Total days of records | Number of days with exceedances | Percentage of days with exceedances in total records |
|-----------|-----------------------|---------------------------------|------------------------------------------------------|-----------|-----------------------|---------------------------------|------------------------------------------------------|
| 5629      | 152                   | 2                               | 1%                                                   | 87056     | 152                   | 0                               | 0%                                                   |
| 5652      | 152                   | 1                               | 1%                                                   | 87199     | 152                   | 0                               | 0%                                                   |
| 6088      | 152                   | 2                               | 1%                                                   | 90093     | 152                   | 2                               | 1%                                                   |
| 6156      | 152                   | 3                               | 2%                                                   | 90105     | 152                   | 9                               | 6%                                                   |
| 6509      | 152                   | 0                               | 0%                                                   | 13254     | 151                   | 3                               | 2%                                                   |
| 8019      | 152                   | 7                               | 5%                                                   | 40224     | 151                   | 20                              | 13%                                                  |
| 9840      | 152                   | 2                               | 1%                                                   | 86883     | 150                   | 2                               | 1%                                                   |
| 10046     | 152                   | 1                               | 1%                                                   | 32992     | 149                   | 5                               | 3%                                                   |
| 11725     | 152                   | 13                              | 9%                                                   | 90230     | 149                   | 2                               | 1%                                                   |
| 11726     | 152                   | 10                              | 7%                                                   | 15659     | 147                   | 3                               | 2%                                                   |
| 11727     | 152                   | 4                               | 3%                                                   | 40642     | 145                   | 3                               | 2%                                                   |
| 11729     | 152                   | 9                               | 6%                                                   | 29508     | 144                   | 0                               | 0%                                                   |
| 11732     | 152                   | 11                              | 7%                                                   | 37505     | 139                   | 0                               | 0%                                                   |
| 11734     | 152                   | 9                               | 6%                                                   | 90336     | 139                   | 2                               | 1%                                                   |

|       |     |    |    |       |     |    |     |
|-------|-----|----|----|-------|-----|----|-----|
| 11947 | 152 | 7  | 5% | 11980 | 132 | 2  | 2%  |
| 11981 | 152 | 4  | 3% | 13206 | 129 | 3  | 2%  |
| 12082 | 152 | 3  | 2% | 90553 | 120 | 3  | 3%  |
| 12083 | 152 | 0  | 0% | 90558 | 119 | 3  | 3%  |
| 12098 | 152 | 11 | 7% | 90604 | 113 | 0  | 0%  |
| 13118 | 152 | 0  | 0% | 90606 | 113 | 4  | 4%  |
| 13215 | 152 | 2  | 1% | 92165 | 112 | 0  | 0%  |
| 13253 | 152 | 0  | 0% | 91985 | 107 | 0  | 0%  |
| 18391 | 152 | 0  | 0% | 96190 | 107 | 3  | 3%  |
| 18392 | 152 | 2  | 1% | 96223 | 106 | 1  | 1%  |
| 32893 | 152 | 1  | 1% | 96251 | 105 | 0  | 0%  |
| 32909 | 152 | 1  | 1% | 96344 | 101 | 1  | 1%  |
| 36614 | 152 | 0  | 0% | 92353 | 88  | 0  | 0%  |
| 36784 | 152 | 3  | 2% | 5628  | 85  | 0  | 0%  |
| 37504 | 152 | 0  | 0% | 96895 | 79  | 10 | 13% |
| 37982 | 152 | 3  | 2% | 96355 | 76  | 8  | 11% |
| 39805 | 152 | 4  | 3% | 97009 | 72  | 1  | 1%  |
| 42631 | 152 | 0  | 0% | 41038 | 71  | 2  | 3%  |
| 86785 | 152 | 3  | 2% | 97387 | 59  | 0  | 0%  |
| 87043 | 152 | 1  | 1% | 97620 | 50  | 0  | 0%  |

**Table S6.** Daily records and number of exceedances of the daily limit value in Bucharest for 2022—outliers list.

| Sensor ID | Total days of records | Number of days with exceedances | Percentage of days with exceedances in total records |
|-----------|-----------------------|---------------------------------|------------------------------------------------------|
| 11725     | 152                   | 13                              | 9%                                                   |
| 11726     | 152                   | 10                              | 7%                                                   |
| 11729     | 152                   | 9                               | 6%                                                   |
| 11732     | 152                   | 11                              | 7%                                                   |
| 11734     | 152                   | 9                               | 6%                                                   |
| 12098     | 152                   | 11                              | 7%                                                   |
| 90105     | 152                   | 9                               | 6%                                                   |
| 96895     | 79                    | 10                              | 13%                                                  |
| 40224     | 151                   | 20                              | 13%                                                  |

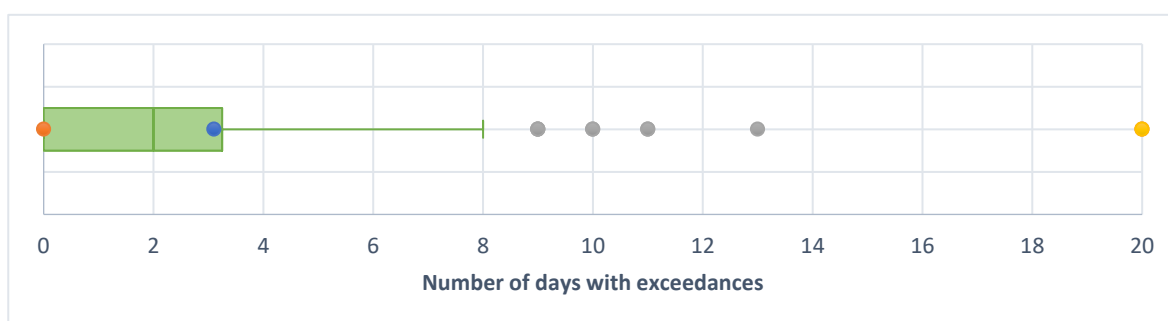

**Figure S1.** Box-plot diagram for the analysis of the distribution of days with exceedances from the year 2022.

**Table S7.** Monthly records (PM10) for the eight sensors.

**Table S8.** Synthesis for all sensors (PM10)—monthly average values for the eight sensors for days with DLV exceedances.

| month/year | Jan        | Feb   | Mar  | Apr  | May | Jun  | Jul | Aug | Sep  | Oct   | Nov   | Dec   |
|------------|------------|-------|------|------|-----|------|-----|-----|------|-------|-------|-------|
| 2018       |            |       |      |      |     |      |     |     |      | 14.28 | 21.00 | 22.85 |
| 2019       | 25.71      | 16.85 | 6.50 | 1.85 |     | 1.00 |     |     | 1.00 | 13.37 | 7.12  | 19.37 |
| 2020       | 21.75      | 5.12  | 2.62 | 1.00 |     |      |     |     |      | 1.37  | 11.14 | 4.37  |
| 2021       | 9.42       | 7.85  | 6.28 |      |     | 1.00 |     |     | 1.00 | 11.50 | 10.25 | 2.37  |
| 2022       | 1.66       | 1.50  | 1.00 |      |     |      |     |     |      |       |       |       |
|            | No records |       | min  |      |     |      |     |     | max  |       |       |       |

**Table S9.** Share of days with exceedances in total records (PM10) for the eight sensors (%).

| Year<br>Sensor | 2018 |   |     |    |    | 2019 |    |    |    |   |   |   |   |   |    |    |    | 2020 |    |    |   |   |   |   |   |    |    |    |    | 2021 |    |   |   |   |   |   |   |    |    |    |    | 2022 |   |   |   |   |   |
|----------------|------|---|-----|----|----|------|----|----|----|---|---|---|---|---|----|----|----|------|----|----|---|---|---|---|---|----|----|----|----|------|----|---|---|---|---|---|---|----|----|----|----|------|---|---|---|---|---|
|                | 8    | 9 | 10  | 11 | 12 | 1    | 2  | 3  | 4  | 5 | 6 | 7 | 8 | 9 | 10 | 11 | 12 | 1    | 2  | 3  | 4 | 5 | 6 | 7 | 8 | 9  | 10 | 11 | 12 | 1    | 2  | 3 | 4 | 5 | 6 | 7 | 8 | 9  | 10 | 11 | 12 | 1    | 2 | 3 | 4 | 5 | 6 |
| 5628           | 0    | 0 | 55  | 60 | 68 | 77   | 50 | 10 | 0  | 0 | 0 | 0 | 0 | 3 | 39 | 10 | 48 | 61   | 7  | 3  | 0 | 0 | 0 | 0 | 0 | 3  | 0  | 33 |    |      | 0  | 0 | 0 | 0 | 0 | 0 | 3 | 32 | 20 | 0  | 0  | 0    | 3 |   |   |   |   |
| 5629           | 0    | 0 | 48  | 57 | 77 | 84   | 57 | 19 | 3  | 0 | 0 | 0 | 0 | 3 | 48 | 17 | 61 | 74   | 17 | 16 | 0 | 0 | 0 | 0 | 0 | 6  | 43 | 19 | 39 | 29   | 23 | 0 | 0 | 0 | 0 | 0 | 0 | 29 | 10 | 0  | 3  | 7    | 3 | 0 | 0 | 0 |   |
| 5652           | 0    | 0 | 48  | 70 | 81 | 84   | 57 | 23 | 3  | 0 | 0 | 0 | 0 | 3 | 32 | 20 | 58 | 68   | 17 | 6  | 0 | 0 | 0 | 0 | 0 | 3  | 40 | 16 | 32 | 29   | 26 | 0 | 0 | 0 | 0 | 0 | 0 | 39 | 33 | 3  | 3  | 0    | 3 | 0 | 0 | 0 |   |
| 6088           |      | 0 | 55  | 73 | 71 | 87   | 57 | 26 | 7  | 0 | 0 | 0 | 0 | 3 | 52 | 30 | 68 | 77   | 17 | 6  | 0 | 0 | 0 | 0 | 0 | 3  | 30 | 13 | 29 | 29   | 23 | 0 | 0 | 0 | 0 | 0 | 3 | 42 | 43 | 6  | 6  | 4    | 3 | 0 | 0 | 0 |   |
| 6156           |      | 0 | 55  | 67 | 74 | 81   | 61 | 26 | 3  | 0 | 3 | 0 | 0 | 3 | 42 | 33 | 68 | 68   | 17 | 10 | 0 | 0 | 0 | 0 | 0 | 3  | 43 | 13 | 32 | 29   | 26 | 0 | 0 | 3 | 0 | 0 | 3 | 39 | 37 | 10 | 3  | 4    | 3 | 0 | 0 | 0 |   |
| 6509           |      |   | 100 | 84 | 71 | 77   | 75 | 29 | 10 | 0 | 0 | 0 | 0 | 3 | 35 | 23 | 55 | 65   | 21 | 3  | 0 | 0 | 0 | 0 | 0 | 3  | 10 | 10 | 16 | 18   | 10 | 0 | 0 | 0 | 0 | 0 | 3 | 39 | 33 | 3  | 0  | 4    | 3 | 0 | 0 | 0 |   |
| 8019           |      |   |     |    |    |      | 57 | 10 | 0  | 0 | 0 | 0 | 0 | 3 | 52 | 27 | 77 | 84   | 31 | 16 | 3 | 0 | 0 | 0 | 0 | 10 | 57 | 26 | 39 | 36   | 32 | 0 | 0 | 0 | 0 | 0 | 3 | 52 | 53 | 19 | 13 | 11   | 3 | 0 | 0 | 0 |   |
| 9840           |      | 0 | 55  | 77 | 74 | 90   | 64 | 23 | 7  | 0 | 0 | 0 | 0 | 3 | 45 | 30 | 65 | 65   | 14 | 6  | 0 | 0 | 0 | 0 | 0 | 3  | 37 | 13 | 26 | 29   | 3  | 0 | 0 | 0 | 0 | 0 | 3 | 42 | 43 | 3  | 3  | 4    | 3 | 0 | 0 | 0 |   |

No records

Exceedances of more than 50% are highlighted in yellow.

**Table S10.** Monthly records (PM2.5) for the eight sensors.

| Year<br>Sensor | 2018 |    |    |    |    | 2019 |    |    |    |    |    |    |    |    |    |    |    | 2020 |    |    |    |    |    |    |    |    |    |    |    | 2021 |    |    |    |    |    |    |    |    |    |    |    | 2022 |    |    |    |    |   |
|----------------|------|----|----|----|----|------|----|----|----|----|----|----|----|----|----|----|----|------|----|----|----|----|----|----|----|----|----|----|----|------|----|----|----|----|----|----|----|----|----|----|----|------|----|----|----|----|---|
|                | 8    | 9  | 10 | 11 | 12 | 1    | 2  | 3  | 4  | 5  | 6  | 7  | 8  | 9  | 10 | 11 | 12 | 1    | 2  | 3  | 4  | 5  | 6  | 7  | 8  | 9  | 10 | 11 | 12 | 1    | 2  | 3  | 4  | 5  | 6  | 7  | 8  | 9  | 10 | 11 | 12 | 1    | 2  | 3  | 4  | 5  | 6 |
| 5628           | 12   | 30 | 31 | 30 | 31 | 31   | 28 | 31 | 30 | 31 | 30 | 31 | 31 | 30 | 31 | 30 | 31 | 31   | 29 | 31 | 30 | 31 | 30 | 31 | 31 | 30 | 31 | 11 | 3  |      |    | 14 | 30 | 31 | 30 | 31 | 31 | 30 | 31 | 30 | 31 | 27   | 28 | 30 |    |    |   |
| 5629           | 11   | 30 | 31 | 30 | 31 | 31   | 28 | 31 | 30 | 31 | 30 | 31 | 31 | 30 | 31 | 30 | 31 | 31   | 29 | 31 | 30 | 31 | 30 | 31 | 31 | 30 | 31 | 30 | 31 | 31   | 28 | 31 | 30 | 31 | 30 | 31 | 31 | 30 | 31 | 30 | 31 | 31   | 28 | 31 | 30 | 31 | 1 |
| 5652           | 9    | 30 | 31 | 30 | 31 | 31   | 28 | 31 | 30 | 31 | 30 | 31 | 31 | 30 | 31 | 30 | 31 | 31   | 29 | 31 | 30 | 31 | 30 | 31 | 31 | 30 | 31 | 30 | 31 | 31   | 28 | 31 | 30 | 31 | 30 | 31 | 31 | 30 | 31 | 30 | 31 | 31   | 28 | 31 | 30 | 31 | 1 |
| 6088           |      | 14 | 31 | 30 | 31 | 31   | 28 | 31 | 30 | 31 | 30 | 31 | 31 | 30 | 31 | 30 | 31 | 31   | 29 | 31 | 30 | 31 | 30 | 31 | 31 | 30 | 31 | 30 | 31 | 31   | 28 | 31 | 30 | 31 | 30 | 31 | 31 | 30 | 31 | 30 | 31 | 31   | 28 | 31 | 30 | 31 | 1 |
| 6156           |      | 3  | 31 | 30 | 31 | 31   | 28 | 31 | 30 | 31 | 30 | 31 | 31 | 30 | 31 | 30 | 31 | 31   | 29 | 31 | 30 | 31 | 30 | 31 | 31 | 30 | 31 | 30 | 31 | 31   | 28 | 31 | 30 | 31 | 30 | 31 | 31 | 30 | 31 | 30 | 31 | 31   | 28 | 31 | 30 | 31 | 1 |
| 6509           |      |    | 2  | 31 | 31 | 31   | 28 | 31 | 30 | 31 | 30 | 31 | 31 | 30 | 31 | 30 | 31 | 31   | 29 | 31 | 29 | 31 | 30 | 31 | 31 | 30 | 31 | 30 | 31 | 31   | 28 | 31 | 30 | 31 | 30 | 31 | 31 | 30 | 31 | 30 | 31 | 31   | 28 | 31 | 30 | 31 | 1 |
| 8019           |      |    |    |    |    |      | 7  | 30 | 31 | 30 | 31 | 31 | 30 | 31 | 30 | 31 | 31 | 29   | 31 | 30 | 31 | 30 | 31 | 31 | 30 | 31 | 30 | 31 | 31 | 31   | 28 | 31 | 30 | 31 | 30 | 31 | 31 | 30 | 21 | 30 | 31 | 31   | 28 | 31 | 30 | 31 | 1 |
| 9840           |      | 4  | 31 | 30 | 31 | 31   | 28 | 31 | 28 | 29 | 19 | 9  | 17 | 30 | 31 | 30 | 31 | 31   | 29 | 31 | 30 | 31 | 30 | 31 | 31 | 30 | 31 | 30 | 31 | 31   | 28 | 31 | 30 | 31 | 30 | 31 | 31 | 30 | 31 | 30 | 31 | 31   | 28 | 31 | 30 | 31 | 1 |
| Max            | 12   | 30 | 31 | 31 | 31 | 31   | 28 | 31 | 30 | 31 | 30 | 31 | 31 | 30 | 31 | 30 | 31 | 31   | 29 | 31 | 30 | 31 | 30 | 31 | 31 | 30 | 31 | 30 | 31 | 31   | 28 | 31 | 30 | 31 | 30 | 31 | 31 | 30 | 31 | 30 | 31 | 31   | 28 | 31 | 30 | 31 | 1 |

No records

Incomplete number of daily records per month

**Table S11.** Synthesis for all sensors (PM2.5)—monthly average values for the eight sensors for days with exceedances of the DLV.

| month/year | Jan        | Feb   | Mar  | Apr    | May  | Jun  | Jul  | Aug  | Sep  | Oct   | Nov   | Dec   |
|------------|------------|-------|------|--------|------|------|------|------|------|-------|-------|-------|
| 2018       |            |       |      |        |      |      |      | 6.33 | 12.2 | 22.14 | 28.71 | 30.42 |
| 2019       | 31         | 27    | 25   | 20.4   | 10.3 | 11.1 | 15.5 | 8.75 | 13.1 | 26.75 | 29.25 | 30.37 |
| 2020       | 30.12      | 20.87 | 20.1 | 11.1   | 1.57 | 3.87 | 1    | 1.33 | 1.87 | 16    | 23.87 | 23.62 |
| 2021       | 29.57      | 25.71 | 19.3 | 17.7   | 1    | 2.87 | 12.1 | 16.4 | 12.8 | 25.25 | 28.75 | 25    |
| 2022       | 23.62      | 20.62 | 25.8 | 10.4   |      |      |      |      |      |       |       |       |
|            | No records |       |      | minmax |      |      |      |      |      |       |       |       |

**Table S12.** Share of days with exceedances in total records (PM2.5) for the eight sensors (%).

| Year | 2018   |            |     |     |                                                        | 2019 |    |     |    |    |    |    |    |    |    |     |     | 2020 |    |    |    |    |    |   |   |    |    |    |     | 2021 |     |    |    |   |    |    |    |    |    |     |    | 2022 |    |    |    |   |   |   |
|------|--------|------------|-----|-----|--------------------------------------------------------|------|----|-----|----|----|----|----|----|----|----|-----|-----|------|----|----|----|----|----|---|---|----|----|----|-----|------|-----|----|----|---|----|----|----|----|----|-----|----|------|----|----|----|---|---|---|
|      | Sensor | 8          | 9   | 10  | 11                                                     | 12   | 1  | 2   | 3  | 4  | 5  | 6  | 7  | 8  | 9  | 10  | 11  | 12   | 1  | 2  | 3  | 4  | 5  | 6 | 7 | 8  | 9  | 10 | 11  | 12   | 1   | 2  | 3  | 4 | 5  | 6  | 7  | 8  | 9  | 10  | 11 | 12   | 1  | 2  | 3  | 4 | 5 | 6 |
| 5628 | 67     | 73         | 74  | 97  | 94                                                     | 100  | 96 | 77  | 70 | 26 | 37 | 48 | 19 | 40 | 84 | 97  | 90  | 97   | 62 | 58 | 30 | 3  | 13 | - | - | 3  | 48 | 82 | 100 |      |     | 64 | 40 | - | 10 | 39 | 48 | 37 | 84 | 93  | 81 | 78   | 71 | 73 |    |   |   |   |
| 5629 | 64     | 60         | 77  | 90  | 97                                                     | 100  | 96 | 94  | 63 | 26 | 33 | 48 | 13 | 37 | 90 | 97  | 97  | 97   | 79 | 65 | 40 | 3  | 13 | - | - | 7  | 52 | 87 | 84  | 97   | 89  | 71 | 50 | - | 7  | 19 | 16 | 27 | 71 | 90  | 68 | 58   | 61 | 61 | 23 | - | - |   |
| 5652 | 44     | 70         | 77  | 93  | 100                                                    | 100  | 96 | 84  | 63 | 23 | 27 | 42 | 19 | 27 | 77 | 93  | 97  | 97   | 69 | 68 | 30 | 3  | 10 | - | - | 3  | 45 | 83 | 87  | 97   | 93  | 74 | 73 | 3 | 10 | 42 | 52 | 37 | 84 | 97  | 84 | 81   | 71 | 81 | 30 | - | - |   |
| 6088 |        | 50         | 87  | 97  | 100                                                    | 100  | 96 | 90  | 70 | 39 | 40 | 65 | 32 | 50 | 87 | 100 | 100 | 97   | 69 | 68 | 37 | -  | 13 | 3 | - | 3  | 55 | 87 | 90  | 97   | 93  | 84 | 77 | - | 10 | 45 | 55 | 50 | 90 | 97  | 81 | 84   | 79 | 87 | 37 | - | - |   |
| 6156 |        | 67         | 81  | 93  | 97                                                     | 100  | 96 | 90  | 67 | 35 | 47 | 61 | 45 | 43 | 87 | 97  | 100 | 97   | 76 | 65 | 40 | 6  | 17 | 3 | 6 | 13 | 55 | 83 | 84  | 97   | 89  | 65 | 57 | - | 10 | 48 | 65 | 43 | 87 | 100 | 81 | 84   | 75 | 90 | 37 | - | - |   |
| 6509 |        |            | 100 | 100 | 100                                                    | 100  | 96 | 100 | 80 | 45 | 50 | 61 | 42 | 50 | 87 | 97  | 100 | 100  | 72 | 65 | 38 | 3  | 10 | - | - | 3  | 45 | 80 | 77  | 87   | 86  | 65 | 50 | - | 10 | 39 | 71 | 43 | 87 | 93  | 84 | 68   | 75 | 94 | 40 | - | - |   |
| 8019 |        |            |     |     |                                                        |      |    | 100 | 63 | 45 | 40 | 55 | 32 | 53 | 87 | 100 | 100 | 97   | 79 | 71 | 43 | 10 | 10 | 3 | 3 | 10 | 52 | 97 | 87  | 97   | 100 | 84 | 67 | - | 10 | 35 | 52 | 60 | 95 | 100 | 87 | 90   | 82 | 94 | 40 | - | - |   |
| 9840 |        | 75         | 97  | 97  | 100                                                    | 100  | 96 | 87  | 71 | 28 | 37 | 67 | 41 | 50 | 90 | 100 | 100 | 97   | 69 | 61 | 40 | 6  | 17 | - | 3 | 7  | 61 | 90 | 90  | 97   | 93  | 26 | -  | 3 | 10 | 45 | 65 | 43 | 84 | 97  | 81 | 77   | 75 | 87 | 37 | - | - |   |
|      |        | No records |     |     | Exceedances of more than 50% are highlighted in yellow |      |    |     |    |    |    |    |    |    |    |     |     |      |    |    |    |    |    |   |   |    |    |    |     |      |     |    |    |   |    |    |    |    |    |     |    |      |    |    |    |   |   |   |



## Section S3. Correlation analysis between chronic pathologies and PM concentrations.

Table S13. *p*-values (Spearman).

| Variables                             | Average of PM10   | Average of PM2.5  | Diseases of the cardiovascular system | Stroke            | Diseases of the respiratory system | Asthma            | COPD              | Diabetes          | Lung cancer  |
|---------------------------------------|-------------------|-------------------|---------------------------------------|-------------------|------------------------------------|-------------------|-------------------|-------------------|--------------|
| Average of PM10                       | <b>0</b>          | <b>&lt;0.0001</b> | <b>0.036</b>                          | <b>0.018</b>      | <b>0.001</b>                       | 0.069             | 0.090             | 0.118             | 0.670        |
| Average of PM2.5                      | <b>&lt;0.0001</b> | <b>0</b>          | <b>0.036</b>                          | <b>0.020</b>      | <b>0.001</b>                       | 0.066             | 0.088             | 0.085             | 0.781        |
| Diseases of the cardiovascular system | <b>0.036</b>      | <b>0.036</b>      | <b>0</b>                              | <b>&lt;0.0001</b> | <b>0.020</b>                       | <b>&lt;0.0001</b> | <b>&lt;0.0001</b> | <b>&lt;0.0001</b> | 0.106        |
| Stroke                                | <b>0.018</b>      | <b>0.020</b>      | <b>&lt;0.0001</b>                     | <b>0</b>          | <b>0.006</b>                       | <b>&lt;0.0001</b> | <b>&lt;0.0001</b> | <b>&lt;0.0001</b> | 0.060        |
| Diseases of the respiratory system    | <b>0.001</b>      | <b>0.001</b>      | <b>0.020</b>                          | <b>0.006</b>      | <b>0</b>                           | 0.166             | 0.221             | <b>0.019</b>      | <b>0.031</b> |
| Asthma                                | 0.069             | 0.066             | <b>&lt;0.0001</b>                     | <b>&lt;0.0001</b> | 0.166                              | <b>0</b>          | <b>&lt;0.0001</b> | <b>&lt;0.0001</b> | 0.569        |
| COPD                                  | 0.090             | 0.088             | <b>&lt;0.0001</b>                     | <b>&lt;0.0001</b> | 0.221                              | <b>&lt;0.0001</b> | <b>0</b>          | <b>&lt;0.0001</b> | 0.525        |
| Diabetes                              | 0.118             | 0.085             | <b>&lt;0.0001</b>                     | <b>&lt;0.0001</b> | <b>0.019</b>                       | <b>&lt;0.0001</b> | <b>&lt;0.0001</b> | <b>0</b>          | 0.498        |
| Lung cancer                           | 0.670             | 0.781             | 0.106                                 | 0.060             | <b>0.031</b>                       | 0.569             | 0.525             | 0.498             | <b>0</b>     |

Values in bold are different from 0 with a significance level  $\alpha=0.05$ .

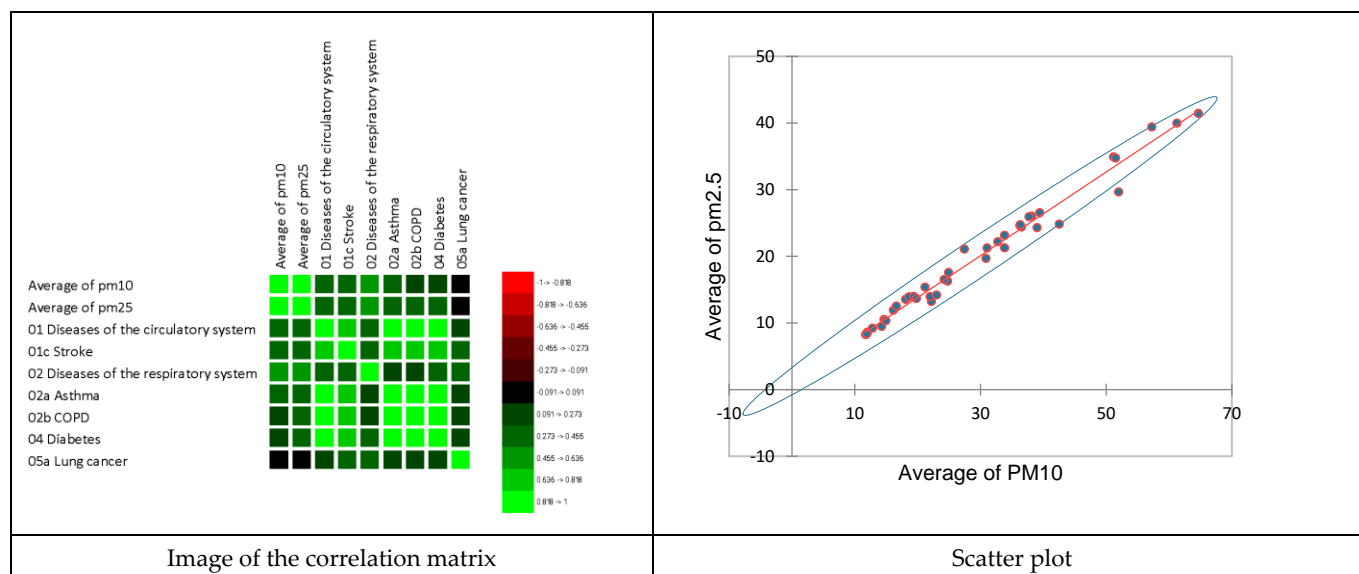

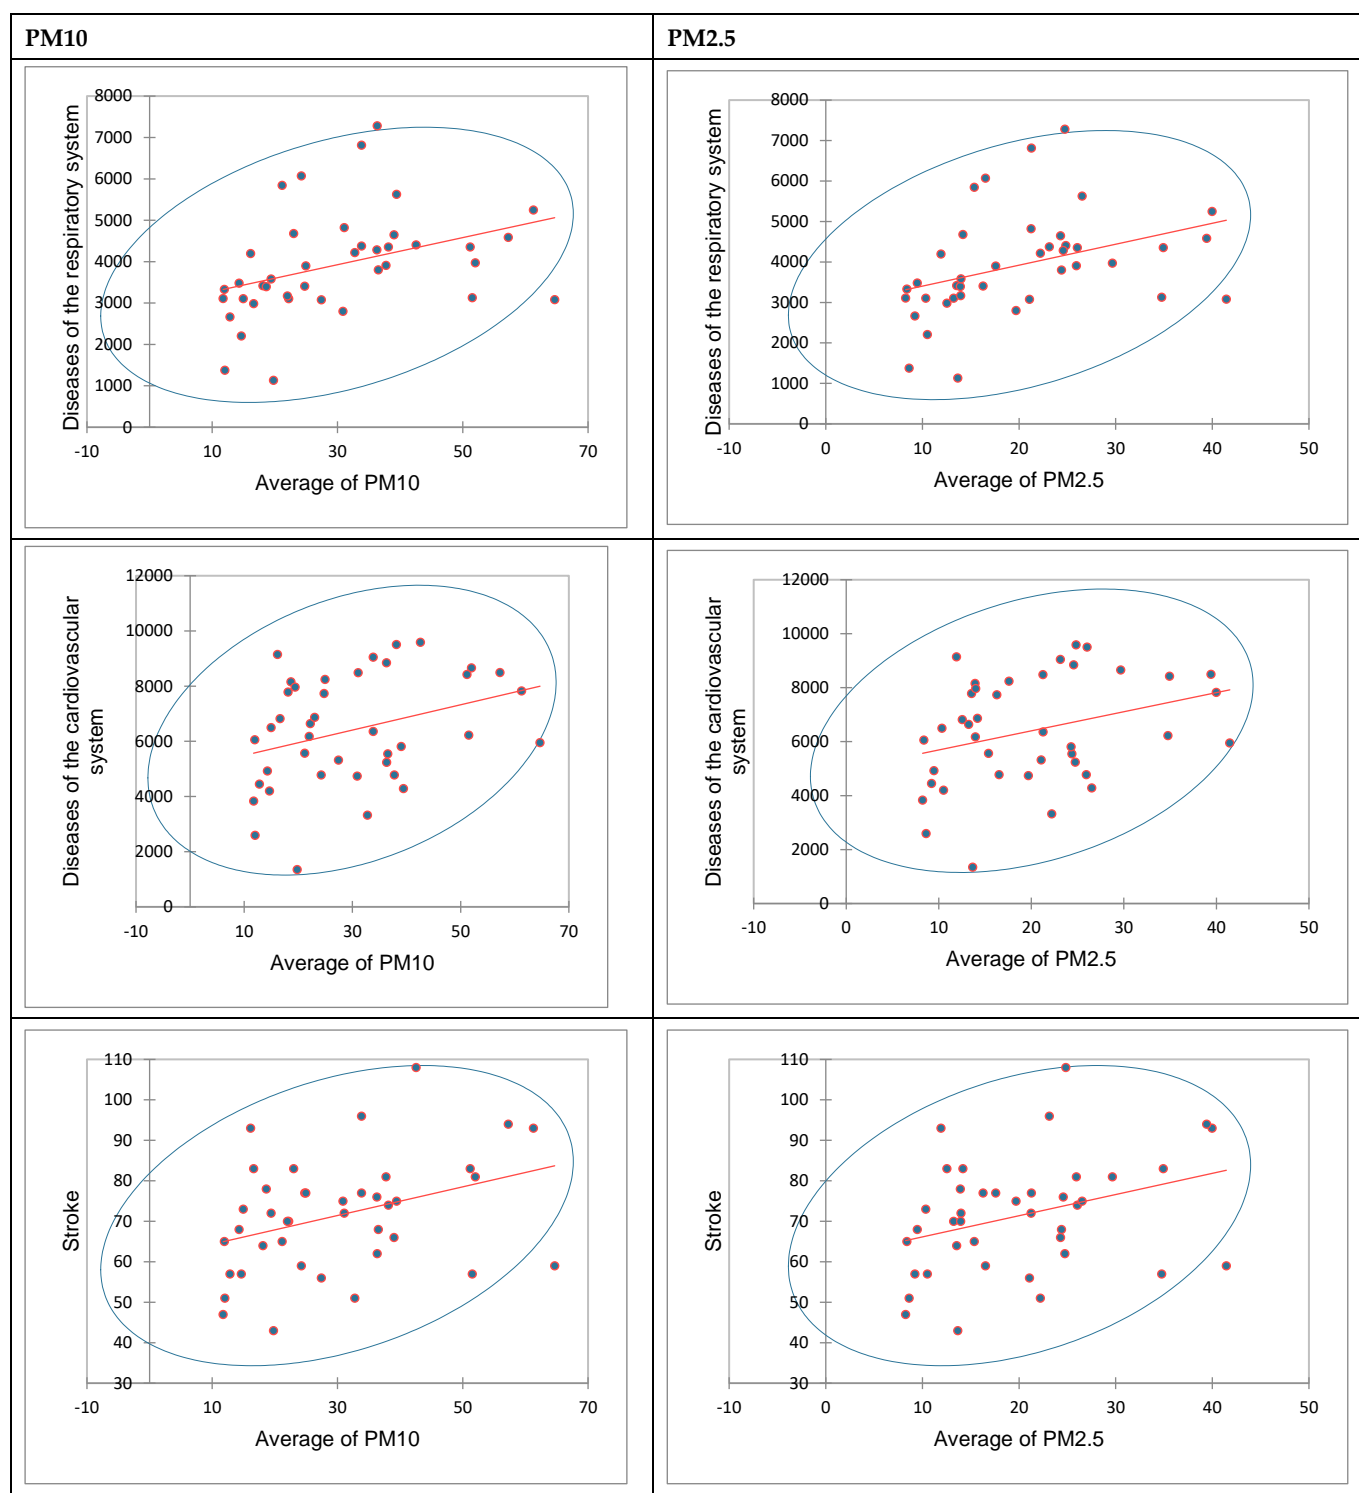

Figure S2. Correlogram.

### Section S4. Analysis of variance (ANOVA) for PM concentrations.

**Table S14.** ANOVA—PM2.5.

| ANOVA               |             |    |             |             |             |             |
|---------------------|-------------|----|-------------|-------------|-------------|-------------|
| Source of Variation | SS          | df | THX         | F           | P-values    | F crit      |
| Between groups      | 2586.485982 | 11 | 235.1350893 | 9.695248232 | 6.51964E-07 | 2.151197456 |
| Within groups       | 679.0731236 | 28 | 24.25261156 |             |             |             |
| Total               | 3265.559106 | 39 |             |             |             |             |

**Table S15.** ANOVA—PM10.

| ANOVA               |             |    |             |             |             |             |
|---------------------|-------------|----|-------------|-------------|-------------|-------------|
| Source of Variation | SS          | df | THX         | F           | P-values    | F crit      |
| Between groups      | 6143.203854 | 11 | 558.4730777 | 7.891591922 | 5.02118E-06 | 2.151197456 |
| Within groups       | 1981.507195 | 28 | 70.76811411 |             |             |             |
| Total               | 8124.711049 | 39 |             |             |             |             |

### Section S5. Descriptive analysis of daily values (PM10 and PM2.5).

**Table S16.** Descriptive statistics—PM10 and PM2.5.

| Statistic | No. of observations | Minimum | Maximum | 1st Quartile | Median | 3rd Quartile | Mean   | Variance (n-1) | Standard deviation (n-1) | Variation coefficient (n-1) | Skewness (Fisher) |
|-----------|---------------------|---------|---------|--------------|--------|--------------|--------|----------------|--------------------------|-----------------------------|-------------------|
| PM10      | 10408               | 0.710   | 216.150 | 15.270       | 24.060 | 38.463       | 29.506 | 411.884        | 20.295                   | 0.688                       | 1.893             |
| PM2.5     | 10408               | 0.480   | 129.350 | 11.170       | 16.905 | 25.600       | 20.060 | 168.318        | 12.974                   | 0.647                       | 1.955             |

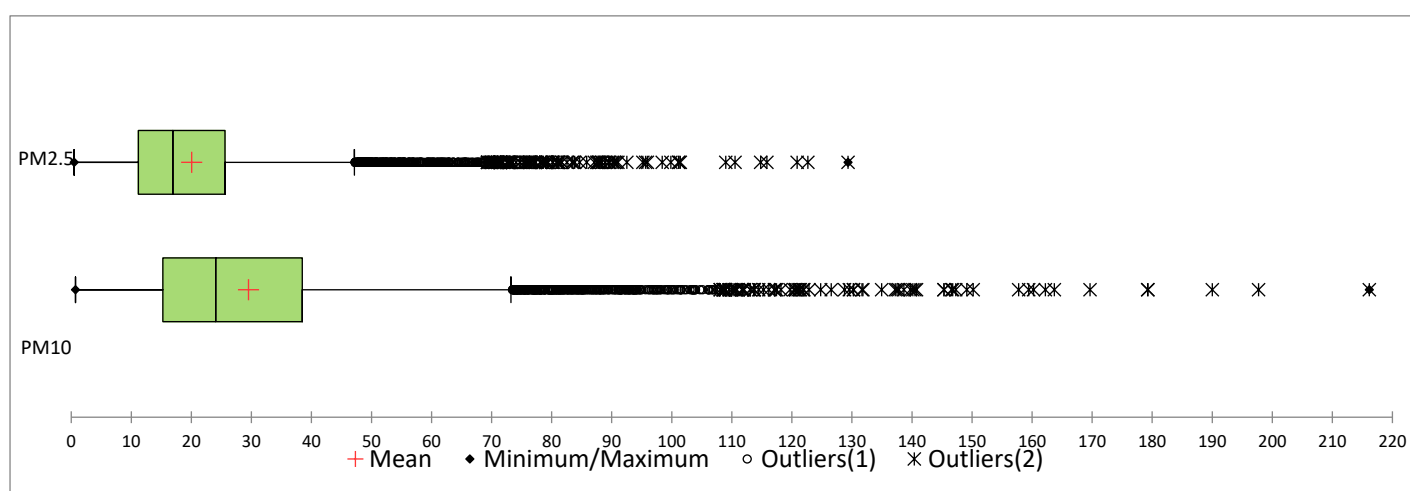

**Figure S3.** Box-plot.
